# Supplementary material
Source: PubMed Central journal article supplement (PMC8353579)
Supplement: NIHMS1728376-supplement-supplementarial.pdf [file NIHMS1728376-supplement-supplementarial.pdf]

## Supplemental Information

**SUPPLEMENTAL TABLE 4** ABCs and MeningNet Sites Participating in the Case-Control Evaluation

| Site                 | Years of Participation |
|----------------------|------------------------|
| ABCs sites           |                        |
| California           | 2006 to 2013           |
| Colorado             | 2006 to 2012           |
| Connecticut          | 2006 to 2013           |
| Georgia              | 2006 to 2013           |
| Maryland             | 2006 to 2013           |
| Minnesota            | 2006 to 2013           |
| New Mexico           | 2006 to 2013           |
| New York             | 2006 to 2013           |
| Oregon               | 2006 to 2013           |
| Tennessee            | 2006 to 2013           |
| MeningNet sites      |                        |
| Alabama              | 2009 to 2013           |
| Arizona              | 2009 to 2013           |
| California, non-ABCs | 2009 to 2013           |
| Colorado, non-ABCs   | 2006 to 2012           |
| Florida              | 2009 to 2013           |
| Houston              | 2009 to 2012           |
| Indiana              | 2009 to 2013           |
| Iowa                 | 2009 to 2012           |
| Kansas               | 2009 to 2011           |
| Maine                | 2006 to 2013           |
| Massachusetts        | 2006 to 2013           |
| Mississippi          | 2009 to 2011           |
| New Hampshire        | 2006 to 2009           |
| New York, non-ABCs   | 2006 to 2009           |
| New York City        | 2006 to 2013           |
| North Carolina       | 2009 to 2013           |
| Oklahoma             | 2009 to 2013           |
| Pennsylvania         | 2006 to 2009           |
| Philadelphia         | 2009 to 2012           |
| South Carolina       | 2006 to 2013           |
| Tennessee, non-ABCs  | 2006 to 2013           |
| Texas                | 2006 to 2009           |
| Washington           | 2009 to 2013           |
| West Virginia        | 2006 to 2009           |
| Wisconsin            | 2006 to 2013           |

**SUPPLEMENTAL TABLE 5** Comparison of Overall VE Estimates, Serogroup Specific VE Estimates, and VE Estimates at Different Time Points Since Vaccination, Controlling for Underlying Medical Conditions and Smoking Generated by Conditional Logistic Regression and GEE, ABCs and MeningNet Sites, 2006 to 2013

|                              | Conditional Logistic Regression | GEE              |
|------------------------------|---------------------------------|------------------|
|                              | VE (95% CI)                     | VE (95% CI)      |
| All Serogroups (C, W, and Y) | 73% (44% to 87%)                | 69% (51% to 80%) |
| Serogroup C                  | 84% (49% to 95%)                | 77% (57% to 88%) |
| Serogroup Y                  | 56% (−41% to 86%)               | 51% (1% to 76%)  |
| Vaccinated <1 y              | 99% (0% to ∞)                   | 79% (49% to 91%) |
| Vaccinated 1 to <3 y         | 79% (39% to 93%)                | 69% (44% to 83%) |
| Vaccinated 3 to <8 y         | 43% (−53% to 79%)               | 61% (25% to 79%) |
